# Supplementary material for: Global genome diversity of the Leishmania donovani complex
Source: eLife. 2020 Mar 25;9:e51243. doi: 10.7554/eLife.51243 (PMC7105377; doi:10.7554/eLife.51243)
Supplement: Supplementary file 2. — Summary of correlations between genetic and geographical distances between sample-pairs from different groups using the Mantel test. Genetic distances were measured as Nei's distances for genome-wide SNPs and geographical distances were calculated as geodesic distances between countries of sample origin. [file elife-51243-supp2.xlsx]

## Sheet: Sheet1
group	correlation	pvalue	Std.Obs	Expectation	Variance	nperm
L. donovani all	0.760553	9.999e-05	26.8872	0.000220647	0.000799678	10000
L. infantum all	-0.124148	0.959304	-1.53853	-0.00134095	0.00637141	10000
L. infantum Linf1: MON1 & non-MON1	0.200858	0.0139986	2.41993	0.000840587	0.00683171	10000
L. infantum Linf1: MON1 & non-MON1 - no America	0.302534	0.00019998	4.40558	0.00113994	0.00468018	10000
L. infantum Linf1: MON1	0.465249	9.999e-05	5.34805	0.000699005	0.00754524	10000
L. infantum Linf1: MON1 - no America	0.808686	9.999e-05	11.588	0.00171224	0.00484952	10000
