# Supplementary material for: Global genome diversity of the Leishmania donovani complex
Source: eLife. 2020 Mar 25;9:e51243. doi: 10.7554/eLife.51243 (PMC7105377; doi:10.7554/eLife.51243)
Supplement: Supplementary file 8. — Sequence matches were identified with nucmer (default parameters) and only the longest match for each query sequence is reported. (spos/epos are start and end positions of the sequence matches seq1 and seq2.) [file elife-51243-supp8.xlsx]

## Sheet: Sheet1
LD1 location on chr LinJPCM5 v38 based on 3 seqs from Sunkin2001
spos1	epos1	spos2	epos2	len1	len2	%identity	seq1	seq2
1967432	1975301	1	7870	7870	7870	97.38	LinJ.35	L25643.1 (Sunkin et al. 2001)
2052926	2062591	1	9679	9666	9679	98.46	LinJ.35	L27052.1 (Sunkin et al. 2001)
2063227	2063681	39	493	455	455	99.34	LinJ.35	U35460.1 (Sunkin et al. 2001)
