# Supplementary material for: Global genome diversity of the Leishmania donovani complex
Source: eLife. 2020 Mar 25;9:e51243. doi: 10.7554/eLife.51243 (PMC7105377; doi:10.7554/eLife.51243)
Supplement: Supplementary file 13. [file elife-51243-supp13.xlsx]

## Sheet: Sheet1
spos1	epos1	spos2	epos2	len1	len2	identity	chr1	chr2	type
205056	205182	206079	206205	127	127	96.85	LinJ.27:190000-300000	LinJ.27:190000-300000	new annotation
277299	277870	295673	296244	572	572	99.48	LinJ.27:190000-300000	LinJ.27:190000-300000	new annotation
269166	269959	264468	265262	794	795	98.87	LinJ.27:190000-300000	LinJ.27:190000-300000	new annotation
270664	272224	267498	269066	1561	1569	92.84	LinJ.27:190000-300000	LinJ.27:190000-300000	also described in Ubeda et al. 2014
